# Supplementary material
Source: Royal Society of Chemistry journal article supplement (doi:10.1039/d6qi00942e)
Supplement: d6qi00942e1.pdf [file d6qi00942e1.pdf]

## *Supporting Information*

### **Diamond-like $\text{Ag}_x\text{Cu}_{3-x}\text{PS}_4$ ( $x = 1, 2$ ) Synthesized by Metal Oxide-Boron-Chalcogen (MOBQ) Routine: Local High-Entropy Engineering for Balanced Infrared Nonlinear Optical Performance**

Ao Guo,<sup>a</sup> Rong-Ling Zhu,<sup>a</sup> Zheng-Ren Chen,<sup>a</sup> Zhi Deng,<sup>a</sup> Zong-Ze Li,<sup>a</sup> Shao-Peng Gui,<sup>a</sup> Mao-Yin Ran<sup>a</sup>  
and Sheng-Ping Guo<sup>\*a,b</sup>

<sup>a</sup>Yunnan Key Laboratory of Electromagnetic Materials and Devices, School of Materials and Energy, Yunnan University, Kunming 650500, P. R. China

<sup>b</sup>Southwest United Graduate School, Kunming 650092, P. R. China

Email: spguo@ynu.edu.cn

# Contents

## 1. Experimental Section

### 2. Tables

**Table S1.** Crystal structure refinement parameters for **1** and **2**.

**Table S2.** Fractional atomic coordinates ( $\times 10^4$ ) and equivalent isotropic displacement parameters ( $\text{\AA}^2 \times 10^3$ ) for **1** and **2**.  $U_{\text{eq}}$  is defined as 1/3 of the trace of the orthogonalized  $U_{ij}$  tensor.

**Table S3.** Bond lengths ( $\text{\AA}$ ) for **1** and **2**.

**Table S4.** Bond angles for **1** and **2**.

**Table S5.** Distortion degrees of polyhedral units in **0–2**.

**Table S6.** Calculated dipole moment results within unit-cells of **0–2**.

**Table S7.** The temperature-dependent ion conductivity for **2**.

**Table S8.** Comparison of the SHG intensities of the reported  $M_3PS_4$  ( $M = \text{Ag}, \text{Cu}$  and  $\text{Ag/Cu}$ )<sup>20</sup>, and  $\text{AgCu}_2\text{PS}_4$ , and  $\text{Ag}_2\text{CuPS}_4$  reported here.

### 3. Figures

**Figure S1.** Rietveld refinement of Powder X-ray diffraction patterns for **1** (a) and **2** (b).

**Figure S2.** Energy dispersion spectroscopies of **1** (a) and **2** (b).

**Figure S3.** Crystal photographs of **1** and **2**.

**Figure S4.** Coordination geometries of Ag/Cu and P atoms in **1** (a) and **2** (b).

**Figure S5.** The SHG signals of **1**, **2** and  $\text{AgGaS}_2$  in the particle size of 250–300  $\mu\text{m}$ .

**Figure S6.** Calculated SHG tensors of **1** (a) and **2** (b).

**Figure S7.** Calculated band structures (a) and Density of states (b) for **1**. The fermi level is set at 0 eV.

### 4. References

# 1. Experimental Section

## Syntheses

All starting materials were used as received without further purification. Ag<sub>2</sub>S (Aladdin, 99.9 %) , Cu<sub>2</sub>O (Aladdin, 99.9 %) , P (Macklin, 98.5 %) , P<sub>2</sub>S<sub>5</sub> (Macklin, 99 %) , S (Aladdin, 99.5 %) , B (Aladdin, 99.9 %) and KI (Macklin, 99 %). Single crystals of AgCu<sub>2</sub>PS<sub>4</sub> (**1**) and Ag<sub>2</sub>CuPS<sub>4</sub> (**2**) were obtained by the facile metal oxide-boron-chalcogen (MOBQ) solid-state reactions with KI as flux. This method was firstly discovered by Prof. Jin-Shun Huang in 1997, which was then well developed by us from 2008 to now.<sup>1-10</sup>

**1:** The raw-materials were weighed according to the molar ratios of Ag<sub>2</sub>S : Cu<sub>2</sub>O : P : S : B = 3 : 6 : 6 : 24 : 4.

**2:** The raw-materials were weighed according to the molar ratios of Ag<sub>2</sub>S : Cu<sub>2</sub>O : P<sub>2</sub>S<sub>5</sub> : S : B = 6 : 3 : 3 : 9 : 2, and P<sub>2</sub>S<sub>5</sub> was weighted in glove box filled with Ar to prevent oxidation and deliquescence.

Each sample has a total mass of 500 mg and additional 400 mg KI.

Each mixture was ground into fine powder in an agate mortar and further pressed into a pellet, followed by being loaded into a quartz tube. The quartz tubes were evacuated to be  $1 \times 10^{-4}$  torr and flame-sealed and then were placed into a muffle furnace, heated from room temperature to 1173 K with several intermediate homogeneous temperatures and kept for 2 days, finally cooled down to 573 K in 5 days, and powered off. The yellow crystals of **1** and **2** were obtained, which were then washed with water and alcohol, followed by being ultrasonic cleaned. These crystals are stable in room temperature for months.

## Structure determination

Single-crystal X-ray diffraction (SXRD) data of **1** and **2** were collected by the Bruker D8 QUEST X-ray diffractometer with graphite-monochromated Mo-K $\alpha$  radiation ( $\lambda = 0.71073 \text{ \AA}$ ) at 293 K. The structures were solved by Direct Methods and SHELXL-2014/7 program package within Olex2 v1.5 software were used to solve and refine the crystal structures.<sup>11,12</sup> Crystal data, structure refinement parameters, atomic coordinates and bond lengths are summarized in **Table S1–S3**. Their CIF documents were also deposited with the CCDC numbers of 2539219 (**1**) and 2539220 (**2**).

### **Powder X-ray diffraction (PXRD) analysis**

The PXRD patterns were collected by the Bruker D8 Advance diffractometer at 40 kV and 100 mA for Cu-K $\alpha$  radiation ( $\lambda = 1.5406 \text{ \AA}$ ) with a scan speed of  $2^\circ \text{ min}^{-1}$  in room temperature. The simulated PXRD patterns were obtained from single-crystal structure data with the Mercury v3.8 software program provided by the Cambridge Crystallographic Data Center.

### **UV-vis-NIR diffuse reflectance spectra**

The diffuse reflectance spectra were measured on the Cary 5000 UV-vis-NIR spectrometer at room temperature in the wavelength range of 200–2100 nm. The BaSO<sub>4</sub> plate was used as the baseline of scanning, on which the finely ground powdery sample was coated.<sup>13</sup> The absorption spectra were calculated from the reflection spectra by the Kubelka-Munk function to obtain the experimental band gaps.<sup>14</sup>

### **Calculation details**

First-principles calculations about the electronic structures and optical properties, and electron localization function (ELF) of **1** and **2** were performed in Materials Studio software base on density functional theory (DFT).<sup>15</sup> The generalized gradient approximation (GGA) by Perdew-Burke-Ernzerhof (PBE) was selected as the exchange-correlation function.<sup>16–17</sup> To ensure the comparability of the results, the computational parameters and convergence criteria for compounds **1** and **2** were maintained identical. The plane-wave cutoff energies for **1** and **2** were both 480.00 eV, and the ultrasoft pseudopotential was selected and the threshold of  $5.0 \times 10^{-7}$  eV was set for the self-consistent-field convergence of the total electronic energy. The electrons in 4d<sup>10</sup>5s<sup>1</sup>, 3d<sup>10</sup>4s<sup>1</sup>, 3s<sup>2</sup>3p<sup>3</sup>, 3s<sup>2</sup>3p<sup>4</sup> orbitals for Ag, Cu, P, S were regarded as valence electrons. The numerical integration of the Brillouin zones were performed using  $4 \times 3 \times 3$  Monkhorst-Pack k-point meshes and the Fermi level at 0 eV was chosen as the reference for **1** and **2**. The real and imaginary parts of the dielectric function were also calculated, which were used to calculated birefringences.<sup>18,19</sup>

### **Ion conductivity measurement**

The electrochemical impedance spectroscopy (EIS) of **2** was measured using an electrochemical workstation (DH7001D) over a frequency range of 1 Hz to 1 MHz. The powder sample was pressed into a pellet with a diameter of 10 mm under a pressure of 380 MPa. The temperature-dependent AC impedance spectroscopy was investigated at variable temperature

from 30 to 80 °C with an increment of 10 °C. The ionic conductivity was calculated via the equation  $\sigma = L/(S \cdot R)$ , where L is the thickness of the pellet sample and S is its area. The total resistance R is equal to the real impedance when the imaginary impedance approaches zero ( $Z'' \approx 0$ ).

## 2. Tables

**Table S1.** Crystal structure refinement parameters for **1** and **2**.

| Chemical formula                                                                                 | AgCu <sub>2</sub> PS <sub>4</sub> (1) | Ag <sub>2</sub> CuPS <sub>4</sub> (2) |
|--------------------------------------------------------------------------------------------------|---------------------------------------|---------------------------------------|
| Fw (g/mol)                                                                                       | 394.20                                | 438.49                                |
| T (K)                                                                                            | 293                                   |                                       |
| Crystal system                                                                                   | Orthorhombic                          |                                       |
| Space group                                                                                      | <i>Pmn</i> 2 <sub>1</sub>             |                                       |
| <i>Z</i>                                                                                         | 2                                     | 2                                     |
| <i>a</i> (Å)                                                                                     | 7.6319(6)                             | 7.6668(8)                             |
| <i>b</i> (Å)                                                                                     | 6.2924(4)                             | 6.6063(6)                             |
| <i>c</i> (Å)                                                                                     | 6.1763(5)                             | 6.3169(5)                             |
| $\alpha$ (°)                                                                                     | 90                                    | 90                                    |
| $\beta$ (°)                                                                                      | 90                                    | 90                                    |
| $\gamma$ (°)                                                                                     | 90                                    | 90                                    |
| <i>V</i> (Å <sup>3</sup> )                                                                       | 296.60(4)                             | 319.95(5)                             |
| $\rho_{\text{calc}}$ (g cm <sup>-3</sup> )                                                       | 4.414                                 | 4.552                                 |
| $\mu$ (mm <sup>-1</sup> )                                                                        | 11.906                                | 10.775                                |
| F(000)                                                                                           | 369.0                                 | 404.0                                 |
| 2 $\theta$ range (°)                                                                             | 6.48 to 54.94                         | 6.168 to 49.934                       |
| Reflections collected                                                                            | 2292                                  | 2302                                  |
| Indep. reflns/R <sub>int</sub>                                                                   | 647/0.0435                            | 595/0.0317                            |
| GOF on <i>F</i> <sup>2</sup>                                                                     | 1.010                                 | 1.124                                 |
| R <sub>1</sub> , <sup>a</sup> wR <sub>2</sub> <sup>b</sup> ( <i>I</i> > 2 $\sigma$ ( <i>I</i> )) | 0.0324, 0.0832                        | 0.0318, 0.0776                        |
| R <sub>1</sub> , <sup>a</sup> wR <sub>2</sub> <sup>b</sup> (all data)                            | 0.0326, 0.0833                        | 0.0337, 0.0788                        |
| $\Delta\rho_{\text{max}}/\Delta\rho_{\text{min}}$ , e/Å <sup>3</sup>                             | 0.65/-1.33                            | 1.28/-1.44                            |
| Flack parameter                                                                                  | 0.07(2)                               | 0.01(2)                               |

$${}^a R_1 = \sum ||F_o| - |F_c|| / \sum |F_o|. \quad {}^b wR_2 = [w(F_o^2 - F_c^2)^2] / [w(F_o^2)^2]^{1/2}.$$

**Table S2.** Fractional atomic coordinates ( $\times 10^4$ ) and equivalent isotropic displacement parameters ( $\text{\AA}^2 \times 10^3$ ) for **1** and **2**.  $U_{\text{eq}}$  is defined as 1/3 of the trace of the orthogonalized  $U_{ij}$  tensor.

| Atom     | Wyckoff site | $x$        | $y$        | $z$        | $U_{\text{eq}}^a / \text{\AA}^2$ |
|----------|--------------|------------|------------|------------|----------------------------------|
| <b>1</b> |              |            |            |            |                                  |
| Ag(1)    | $2a$         | 5000       | 3527.1(12) | 866.2(4)   | 30.5(3)                          |
| Cu(1)    | $4b$         | 7526.1(9)  | 8138.4(11) | 915.5(10)  | 18.5(3)                          |
| P(1)     | $4b$         | 5000       | 6875(3)    | 5820(3)    | 5.9(4)                           |
| S(1)     | $2a$         | 7202(2)    | 8367(2)    | 4639(2)    | 12.2(3)                          |
| S(2)     | $2a$         | 5000       | 3725(3)    | 4907(3)    | 11.1(4)                          |
| S(3)     | $2a$         | 5000       | 7171(4)    | 9165(3)    | 13.6(5)                          |
| <b>2</b> |              |            |            |            |                                  |
| Ag(1)    | $2a$         | 5000       | 6483(3)    | 4320(4)    | 55.5(7)                          |
| Ag(2)    | $4b$         | 7672.9(17) | 1960.3(18) | 4020.4(18) | 38.1(5)                          |
| Cu(1)    | $4b$         | 7672.9(17) | 1960.3(18) | 4020.4(18) | 38.1(5)                          |
| P(1)     | $2a$         | 10000      | 6939(5)    | 4196(8)    | 12.0(8)                          |
| S(1)     | $2a$         | 5000       | 2945(7)    | 5913(7)    | 19.8(10)                         |
| S(2)     | $4b$         | 7816(4)    | 8418(6)    | 5253(6)    | 31.2(8)                          |
| S(3)     | $2a$         | 10000      | 4019(9)    | 5276(9)    | 41.2(14)                         |

<sup>a</sup> $U_{\text{eq}}$  is defined as one third of the trace of the orthogonalized  $U_{ij}$  tensor.

**Table S3.** Bond lengths (Å) for **1** and **2**.

| Bond         | Length/Å   | Bond         | Length/Å   |
|--------------|------------|--------------|------------|
| <b>1</b>     |            |              |            |
| Ag(1)–S(1)#1 | 2.5603(17) | Cu(1)–S(2)#5 | 2.3081(13) |
| Ag(1)–S(1)#2 | 2.5603(17) | Cu(1)–S(3)#6 | 2.2927(13) |
| Ag(1)–S(2)   | 2.4988(18) | P(1)–S(1)    | 2.0588(18) |
| Ag(1)–S(3)#3 | 2.522(2)   | P(1)–S(2)    | 2.061(2)   |
| Cu(1)–S(1)#4 | 2.3451(16) | P(1)–S(3)    | 2.074(3)   |
| Cu(1)–S(1)   | 2.3173(18) |              |            |
| <b>2</b>     |            |              |            |
| Ag(1)–S(1)   | 2.544(5)   | Cu(1)–S(2)#2 | 2.422(4)   |
| Ag(1)–S(2)#1 | 2.577(4)   | Cu(1)–S(2)#3 | 2.469(4)   |
| Ag(1)–S(2)   | 2.577(4)   | Cu(1)–S(3)   | 2.380(5)   |
| Ag(1)–S(3)#2 | 2.576(6)   | P(1)–S(2)#5  | 2.050(4)   |
| Ag(2)–S(1)   | 2.460(3)   | P(1)–S(2)    | 2.050(4)   |
| Ag(2)–S(3)   | 2.380(5)   | P(1)–S(3)    | 2.046(6)   |
| Cu(1)–S(1)   | 2.460(3)   | P(1)–S(1)#4  | 2.076(7)   |

Symmetry transformations used to generate equivalent atoms: For **1**: #1 $3/2-x$ ,  $1-y$ ,  $-1/2+z$ ; #2 $-1/2+x$ ,  $1-y$ ,  $-1/2+z$ ; #3 $+x$ ,  $+y$ ,  $-1+z$ ; #4 $3/2-x$ ,  $2-y$ ,  $-1/2+z$ ; #5 $1/2+x$ ,  $1-y$ ,  $-1/2+z$ ; #6 $1-x$ ,  $+y$ ,  $-1+z$ . For **2**: #1 $-x$ ,  $+y$ ,  $+z$ ; #2 $3/2-x$ ,  $1-y$ ,  $-1/2+z$ ; #3 $+x$ ,  $-1+y$ ,  $+z$ ; #4 $2-x$ ,  $+y$ ,  $+z$ .

**Table S4.** Bond angles for **1** and **2**.

| Atom               | Atom  | Atom               | Angle/°    | Atom               | Atom  | Atom               | Angle/°    |
|--------------------|-------|--------------------|------------|--------------------|-------|--------------------|------------|
| <b>1</b>           |       |                    |            |                    |       |                    |            |
| S(1) <sup>#1</sup> | Ag(1) | S(1) <sup>#2</sup> | 113.02(7)  | S(3) <sup>#6</sup> | Cu(1) | S(2) <sup>#4</sup> | 115.19(6)  |
| S(2)               | Ag(1) | S(1) <sup>#2</sup> | 108.60(4)  | S(1) <sup>#7</sup> | P(1)  | S(1)               | 109.43(12) |
| S(2)               | Ag(1) | S(1) <sup>#1</sup> | 108.60(4)  | S(2)               | P(1)  | S(1)               | 109.98(9)  |
| S(3) <sup>#3</sup> | Ag(1) | S(1) <sup>#2</sup> | 107.45(4)  | S(2)               | P(1)  | S(1) <sup>#7</sup> | 109.98(9)  |
| S(3) <sup>#3</sup> | Ag(1) | S(1) <sup>#1</sup> | 107.45(4)  | S(3)               | P(1)  | S(1)               | 108.18(8)  |
| S(3) <sup>#3</sup> | Ag(1) | S(2)               | 111.77(7)  | S(3)               | P(1)  | S(1) <sup>#7</sup> | 108.18(8)  |
| S(2) <sup>#4</sup> | Cu(1) | S(1)               | 112.75(7)  | S(3)               | P(1)  | S(2)               | 111.03(13) |
| S(2) <sup>#4</sup> | Cu(1) | S(1) <sup>#5</sup> | 108.25(6)  |                    |       |                    |            |
| S(3) <sup>#6</sup> | Cu(1) | S(1)               | 113.25(6)  |                    |       |                    |            |
| S(3) <sup>#6</sup> | Cu(1) | S(1) <sup>#5</sup> | 99.49(7)   |                    |       |                    |            |
| <b>2</b>           |       |                    |            |                    |       |                    |            |
| S(1)               | Ag(1) | S(2) <sup>#1</sup> | 111.41(11) | S(2)               | P(1)  | S(1) <sup>#2</sup> | 107.9(2)   |
| S(1)               | Ag(1) | S(2)               | 111.41(11) | S(2) <sup>#4</sup> | P(1)  | S(1) <sup>#2</sup> | 107.9(2)   |
| S(1)               | Ag(1) | S(3) <sup>#2</sup> | 105.90(19) | S(2) <sup>#4</sup> | P(1)  | S(2)               | 107.9(2)   |
| S(2) <sup>#1</sup> | Ag(1) | S(2)               | 113.79(17) | S(3)               | P(1)  | S(1) <sup>#2</sup> | 111.6(3)   |
| S(3) <sup>#2</sup> | Ag(1) | S(2) <sup>#1</sup> | 106.91(11) | S(3)               | P(1)  | S(2)               | 109.9(2)   |
| S(3) <sup>#2</sup> | Ag(1) | S(2)               | 106.91(11) | S(3)               | P(1)  | S(2) <sup>#4</sup> | 109.9(2)   |
| S(1)               | Cu(1) | S(2) <sup>#3</sup> | 97.73(15)  | S(1)               | Ag(2) | S(2) <sup>#3</sup> | 97.73(15)  |
| S(2) <sup>#2</sup> | Cu(1) | S(1)               | 112.07(13) | S(2) <sup>#2</sup> | Ag(2) | S(1)               | 112.07(13) |
| S(2) <sup>#2</sup> | Cu(1) | S(2) <sup>#3</sup> | 102.66(11) | S(2) <sup>#2</sup> | Ag(2) | S(2) <sup>#3</sup> | 102.66(11) |
| S(3)               | Cu(1) | S(1)               | 108.14(16) | S(3)               | Ag(2) | S(1)               | 108.14(16) |
| S(3)               | Cu(1) | S(2) <sup>#3</sup> | 113.79(15) | S(3)               | Ag(2) | S(2) <sup>#2</sup> | 113.79(15) |
| S(3)               | Cu(1) | S(2) <sup>#2</sup> | 120.16(18) | S(3)               | Ag(2) | S(2) <sup>#3</sup> | 120.16(18) |

Symmetry transformation used to generate equivalent atoms: For **1**: #1  $-1/2+x$ ,  $1-y$ ,  $-1/2+z$ ; #2  $3/2-x$ ,  $1-y$ ,  $-1/2+z$ ; #3  $+x$ ,  $+y$ ,  $-1+z$ ; #4  $1/2+x$ ,  $1-y$ ,  $-1/2+z$ ; #5  $3/2-x$ ,  $2-y$ ,  $-1/2+z$ ; #6  $1-x$ ,  $+y$ ,  $-1+z$ ; #7  $1-x$ ,  $+y$ ,  $+z$ ; For **2**: #1  $1-x$ ,  $+y$ ,  $+z$ ; #2  $3/2-x$ ,  $1-y$ ,  $-1/2+z$ ; #3  $+x$ ,  $-1+y$ ,  $+z$ ; #4  $2-x$ ,  $+y$ ,  $+z$ .

**Table S5.** Distortion degrees of tetrahedral units in **0–2**.

| <b>Unit</b>                 | <b>DI (S–M–S)</b> | <b>DI (M–S)</b> | <b>DI (S–S)</b> |
|-----------------------------|-------------------|-----------------|-----------------|
| <b>0</b>                    |                   |                 |                 |
| <b>Cu(1)S<sub>4</sub></b>   | 0.010000420       | 0.01207394      | 0.00667115      |
| <b>Cu(2)S<sub>4</sub></b>   | 0.03405344        | 0.00357646      | 0.02245589      |
| <b>PS<sub>4</sub></b>       | 0.00691533        | 0.00247555      | 0.02442735      |
| <b>1</b>                    |                   |                 |                 |
| <b>AgS<sub>4</sub></b>      | 0.01123334        | 0.009762351     | 0.011905912     |
| <b>CuS<sub>4</sub></b>      | 0.0410516         | 0.00658534      | 0.023787853     |
| <b>PS<sub>4</sub></b>       | 0.007920026       | 0.002605113     | 0.004967297     |
| <b>2</b>                    |                   |                 |                 |
| <b>AgS<sub>4</sub></b>      | 0.0257334         | 0.004671078     | 0.016512573     |
| <b>(Cu/Ag)S<sub>4</sub></b> | 0.0572758         | 0.01315519      | 0.034699644     |
| <b>PS<sub>4</sub></b>       | 0.0095943         | 0.004804768     | 0.00519388      |

**Table S6.** Calculated dipole moment results within unit-cells of **0–2**.

| Compound | Dipole moment         |          |          |           |                                         |        |
|----------|-----------------------|----------|----------|-----------|-----------------------------------------|--------|
|          | <i>x</i>              | <i>y</i> | <i>z</i> | Magnitude |                                         |        |
|          |                       |          |          | Debye     | $\times 10^{-4}$ esu·cm·Å <sup>-3</sup> |        |
| <b>0</b> | Cu(1)S <sub>4</sub>   | 0        | -4.5890  | 7.1034    | 8.4568                                  | 0.0603 |
|          | Cu(2)S <sub>4</sub>   | -0.6992  | 46.7586  | 38.0879   | 60.3120                                 | 0.4302 |
|          | PS <sub>4</sub>       | -0.0004  | -7.1905  | -10.3163  | 12.5749                                 | 0.0897 |
| <b>1</b> | AgS <sub>4</sub>      | -0.0006  | -6.6509  | 15.9535   | 17.2844                                 | 0.1166 |
|          | CuS <sub>4</sub>      | -42.7020 | -36.3740 | 64.0035   | 85.1057                                 | 0.5739 |
|          | PS <sub>4</sub>       | 0.0008   | -14.2563 | -11.0708  | 18.0500                                 | 0.1217 |
| <b>2</b> | AgS <sub>4</sub>      | 0        | 1.3955   | -13.9125  | 13.9823                                 | 0.0874 |
|          | (Cu/Ag)S <sub>4</sub> | -5.2170  | -37.6707 | -74.8507  | 83.9579                                 | 0.5248 |
|          | PS <sub>4</sub>       | 0        | 18.6971  | 66.539    | 69.1160                                 | 0.4320 |

**Table S7.** The temperature-dependent ion conductivity for **2**.

| Temperatures / °C | Ion conductivity / mS/cm |
|-------------------|--------------------------|
| 30                | $9.35 \times 10^{-5}$    |
| 40                | $9.00 \times 10^{-5}$    |
| 50                | $1.34 \times 10^{-4}$    |
| 60                | $4.60 \times 10^{-4}$    |
| 70                | $7.08 \times 10^{-4}$    |
| 80                | $9.30 \times 10^{-4}$    |

**Table S8.** Comparison of the SHG intensities of the reported  $M_3PS_4$  ( $M = Ag, Cu$  and  $Ag/Cu$ )<sup>20</sup>, and  $AgCu_2PS_4$ , and  $Ag_2CuPS_4$  reported here.

| <b>Compound</b>                      | <b>SHG intensity (<math>\times</math> AGS)</b> |
|--------------------------------------|------------------------------------------------|
| $Cu_3PS_4$                           | 0.5 (NPM)                                      |
| $Ag_{1.5}Cu_{1.5}PS_4$               | 0.8                                            |
| $Ag_3PS_4$                           | 1.3                                            |
| $AgCu_2PS_4$ ( <b>1</b> , this work) | 0.7                                            |
| $Ag_2CuPS_4$ ( <b>2</b> , this work) | 1.1                                            |

### 3. Figures

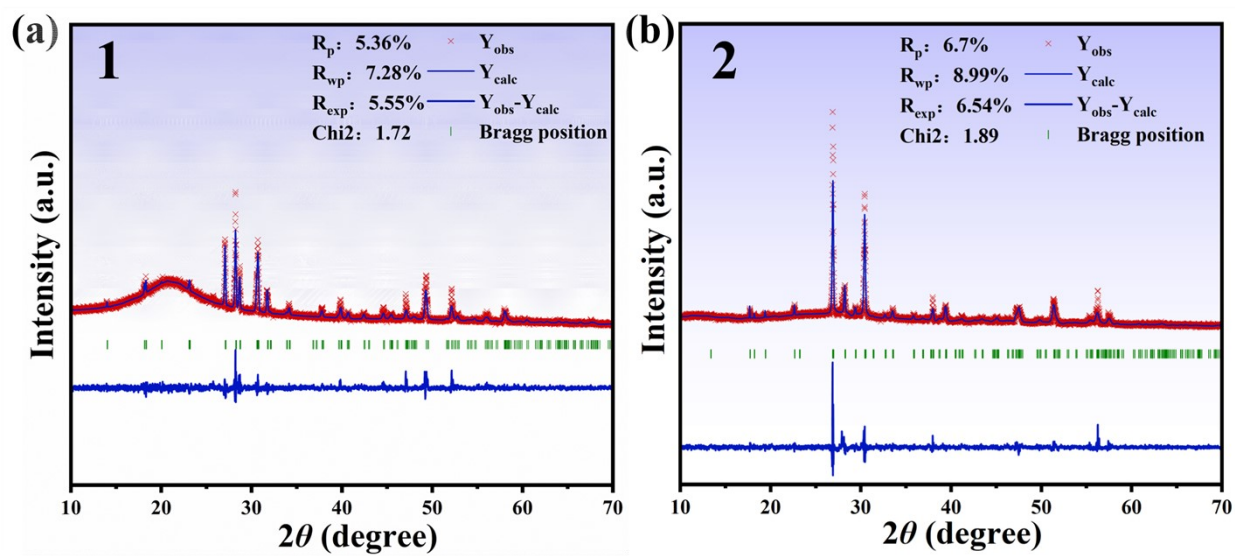

Figure S1. Rietveld refinement of Powder X-ray diffraction patterns for 1 (a) and 2 (b).

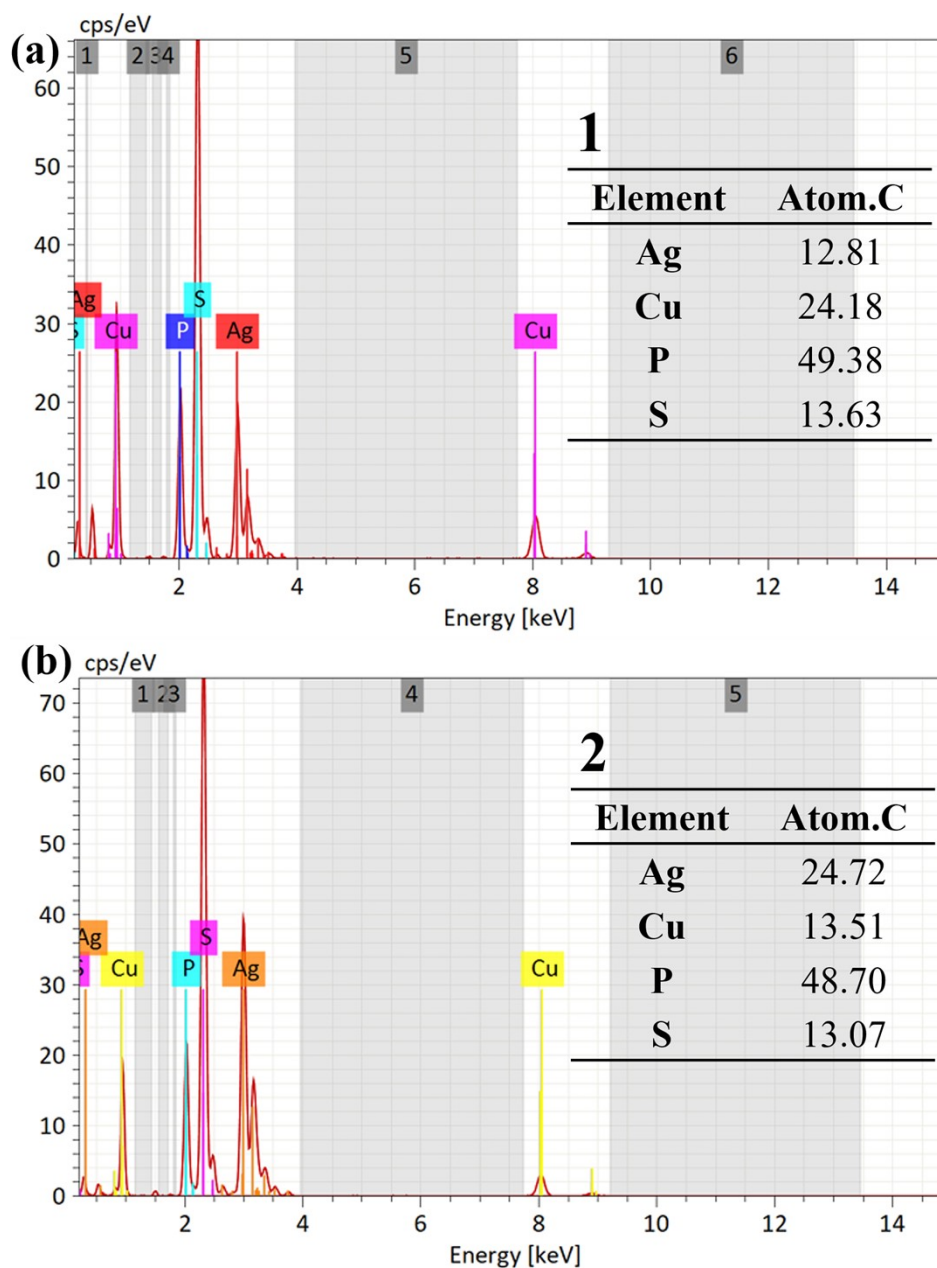

**Figure S2.** Energy dispersion spectroscopies of **1** (a) and **2** (b). Inset: the molar ratios of component elements.

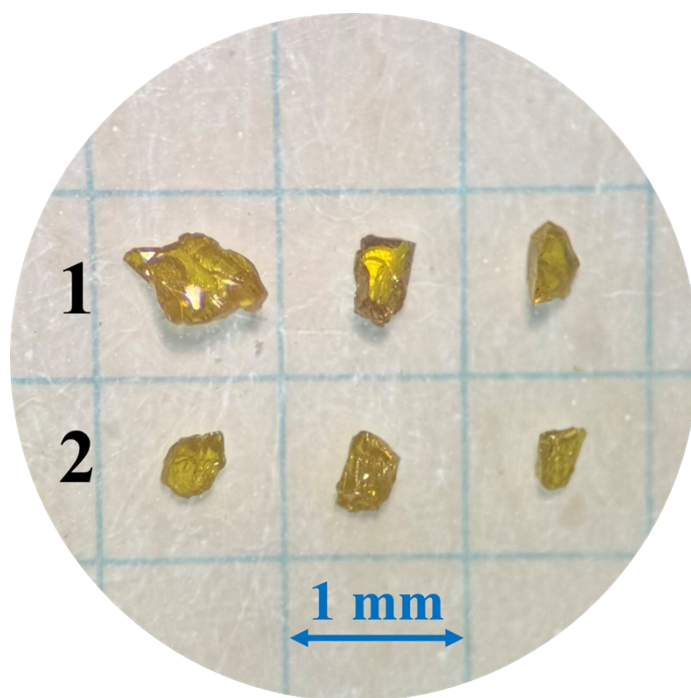

**Figure S3.** Crystal photographs of **1** and **2**.

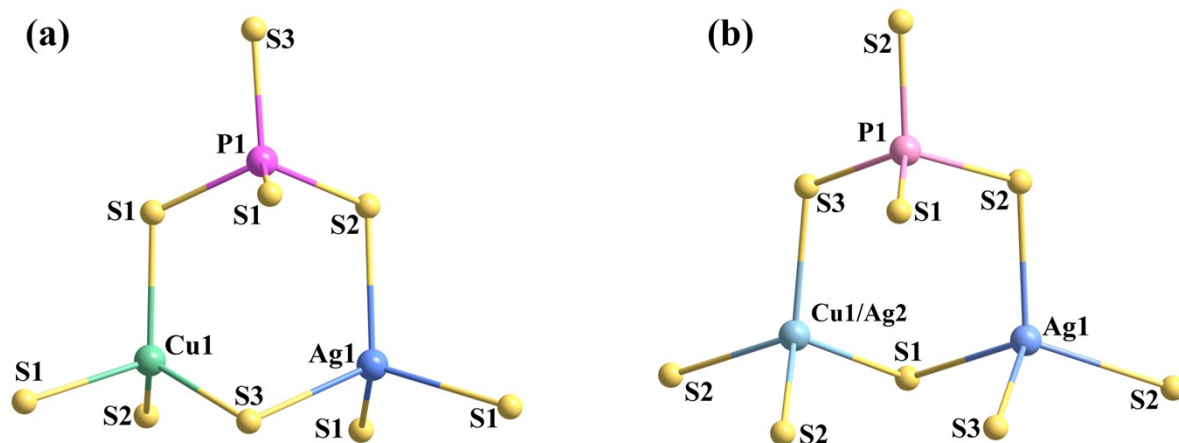

**Figure S4.** Coordination geometries of Ag/Cu and P atoms in **1** (a) and **2** (b).

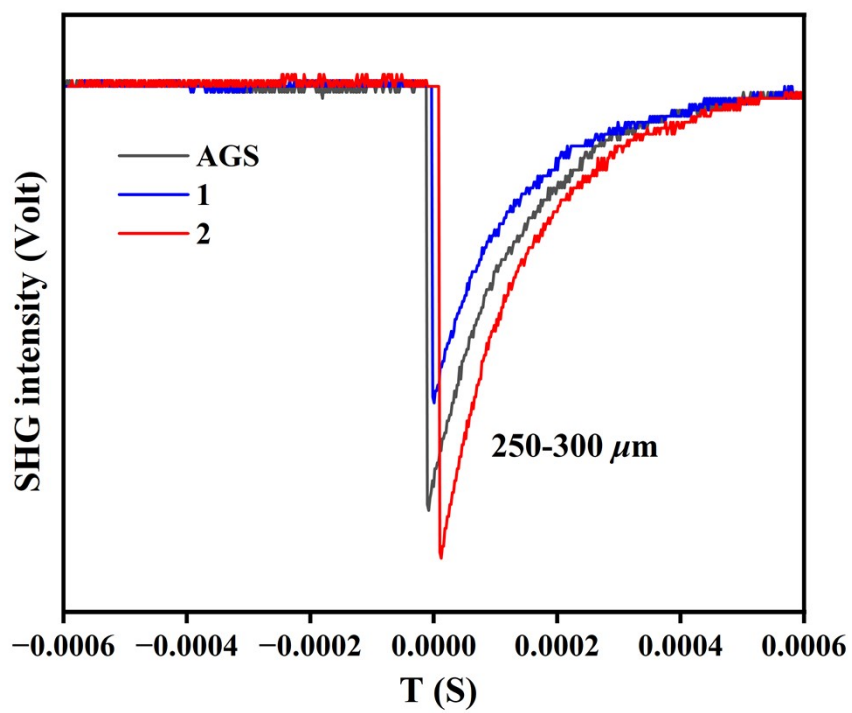

**Figure S5.** The relative SHG signals of **1**, **2** and AgGaS<sub>2</sub> in the particle size of 250–300 μm

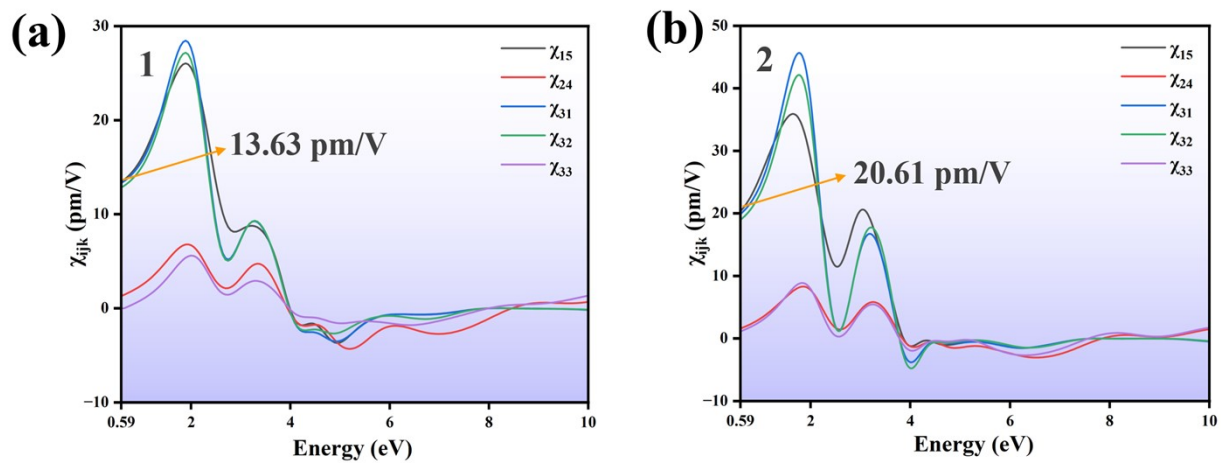

**Figure S6.** Calculated SHG tensors of **1** (a) and **2** (b).

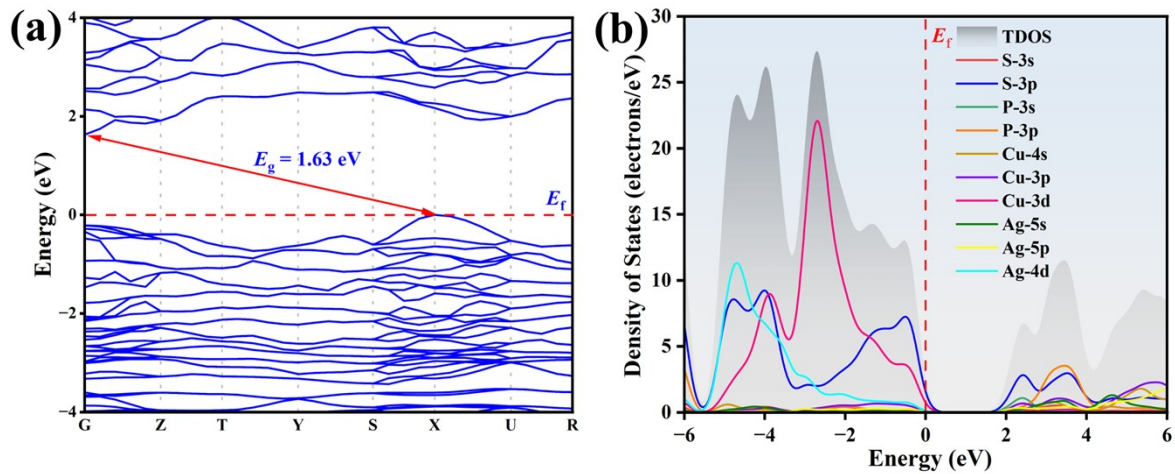

**Figure S7.** Calculated band structure (a) and density of states (b) for **1**. The fermi level is set at 0 eV.

## 4. References

- (1) S. P. Guo, G. C. Guo, M. S. Wang, J. P. Zou, G. Xu, G. J. Wang, X. F. Long and J. S. Huang, A Series of New Infrared NLO Semiconductors,  $\text{ZnY}_6\text{Si}_2\text{S}_{14}$ ,  $\text{Al}_x\text{Dy}_3(\text{Si}_y\text{Al}_{1-y})\text{S}_7$ , and  $\text{Al}_{0.33}\text{Sm}_3\text{SiS}_7$ . *Inorg. Chem.*, 2009, **48**, 7059–7065.
- (2) S. P. Guo, G. C. Guo, M. S. Wang, J. P. Zou, H. Y. Zeng, L. Z. Cai and J. S. Huang, A Facile Approach to Hexanary Chalcogenoborate Featuring a 3-D Chiral Honeycomb-like Open-Framework Constructed from Rare-Earth Consolidating Thiogallate-Closo-Dodecaborate. *Chem. Commun.*, 2009, 4366–4368.
- (3) S. P. Guo, G. E. Wang, M. J. Zhang, M. F. Wu, G. N. Liu, X. M. Jiang, G. C. Guo and J. S. Huang, Novel Single-Crystal's Voltage-Dependent Effect and Magnetic Order of  $\text{Ln}_2\text{ZrQ}_5$  (Ln = La, Sm, Gd; Q = S, Se) Semiconductors. *Dalton Trans.*, 2013, **42**, 2679–2682.
- (4) S. P. Guo and G. C. Guo, Crystal Structure and Magnetic and Photocatalytic Properties of a New Ternary Rare-Earth Mixed Chalcogenide,  $\text{Dy}_4\text{S}_4\text{Te}_3$ . *J. Mater. Chem. A.*, 2014, **2**, 20621–20628.
- (5) S. P. Guo, Y. Chi and H. G. Xue,  $\text{Sm}_3\text{S}_3\text{BO}_3$ : The First Sulfide Borate without S–O and B–S Bonds. *Inorg. Chem.*, 2015, **54**, 11052–11054.
- (6) X. H. Li, N. T. Suen, Y. Chi, Y. Sun, A. Gong, H. Xue and S. P. Guo, Partial Congener Substitution Induced Centrosymmetric to Noncentrosymmetric Transformation Witnessed by  $\text{K}_3\text{Ga}_3(\text{Ge}_{7-x}\text{M}_x)\text{Se}_{20}$  (M = Si, Sn) and Their Nonlinear Optical Properties. *Inorg. Chem.*, 2019, **58**, 13250–13257.
- (7) Z. H. Shi, M. Yang, W. D. Yao, W. Liu and S. P. Guo,  $\text{SnPQ}_3$  (Q = S, Se, S/Se): A Series of Lone-Pair Cationic Chalcogenophosphates Exhibiting Balanced NLO Activity Originating from  $\text{SnQ}_8$  Units. *Inorg. Chem.*, 2021, **60**, 14391–14398.
- (8) W. Zhou, W. D. Yao, Q. Zhang, H. Xue and S. P. Guo, Introduction of Li into Ag-Based Noncentrosymmetric Sulfides for High-Performance Infrared Nonlinear Optical Materials. *Inorg. Chem.*, 2021, **60**, 5198–5205.
- (9) C. Y. Zhao, C. L. Hu, N. T. Suen, X. H. Li, H. P. Xu, W. Zhou and S. P. Guo, Rare-Earth Substitution Induced Symmetry Breaking for the First Sc-Based Nonlinear Optical Chalcogenide with High-Performance. *Adv. Sci.*, 2025, **12**, 2411960.

- (10) Y. Xie, W. D. Yao, Q. Y. Du, W. Zhou, N. T. Suen, W. Liu and S. P. Guo, From  $\text{NaSc}_3\text{Ga}_2\text{Q}_8$  (Q = S, Se) to  $\text{KGa}_2\text{In}_3\text{S}_8$ : Substitution of  $\text{Sc}^{3+}$  with  $\text{In}^{3+}$  to Achieve Doubled Birefringence. *Chem. Sci.*, 2025, **16**, 17207–17213.
- (11) G. M. Sheldrick, Crystal Structure Refinement with *SHELXL*. *Acta Crystallogr C Struct Chem.*, 2015, **71**, 3–8.
- (12) O. V. Dolomanov, L. J. Bourhis, R. J. Gildea, J. A. K. Howard and H. Puschmann, H. OLEX2: A Complete Structure Solution, Refinement and Analysis Program, *J. Appl. Cryst.*, 2009, **42**, 339–341.
- (13) W. W. Wendlandt and H. G. Hecht, Reflectance Spectroscopy, Interscience Publishers, New York., 1966.
- (14) G. Kortüm, Reflectance Spectroscopy, *Springer.*, 1969.
- (15) S. Clark, M. C. Segall, P. Hasnip, M. Probert, K. Refson and M. Payne, First Principles Methods Using CASTEP, *Z. Kristallogr. Cryst. Mater.*, 2005, **220**, 567–570.
- (16) M. Gajdoš, K. Hummer, G. Kresse, J. Furthmüller and F. Bechstedt, F. Linear Optical Properties in the Projector-Augmented Wave Methodology, *Phys. Rev. B.*, 2006, **73**, 045112.
- (17) J. P. Perdew, K. Burke and M. Ernzerhof, Generalized Gradient Approximation Made Simple. *Phys. Rev. Lett.*, 1996, **77**, 3865–3868.
- (18) S. D. Mo and W. Y. Ching, Electronic and Optical Properties of Three Phases of Titanium Dioxide: Rutile, Anatase, and Brookite. *Phys. Rev. B.*, 1995, **51**, 13023–13032.
- (19) S. Laksari, A. Chahed, N. Abbouni, O. Benhelal and B. Abbar, First-Principles Calculations of The Structural, Electronic and Optical Properties of  $\text{CuGaS}_2$  and  $\text{AgGaS}_2$ , *Comp. Mater. Sci.*, 2006, **38**, 223–230.
- (20) Y. Yang, B. Zhang, X. Wu and K. Wu, A Series of  $\text{M}_3\text{PS}_4$  (M = Ag, Cu and Ag/Cu) Thiophosphates with Diamond-like Structures Exhibiting Large Second Harmonic Generation Responses and Moderate Ion Conductivities. *Dalton Trans.*, 2021, **50**, 4129–4132.
